# Supplementary material
Source: PubMed Central journal article supplement (PMC7237188)

# THE LANCET

## Supplementary appendix

This appendix formed part of the original submission and has been peer reviewed.  
We post it as supplied by the authors.

Supplement to: Cummings MJ, Baldwin MR, Abrams D, et al. Epidemiology, clinical course, and outcomes of critically ill adults with COVID-19 in New York City: a prospective cohort study. *Lancet* 2020; published online May 19. [https://doi.org/10.1016/S0140-6736\(20\)31189-2](https://doi.org/10.1016/S0140-6736(20)31189-2).

## Web Appendix

**Table S1: Ordinal Scale Used to Evaluate Clinical Status During Hospitalization**

| Clinical Status                                                                                                                                       | Point |
|-------------------------------------------------------------------------------------------------------------------------------------------------------|-------|
| Not hospitalized, performing normal activities                                                                                                        | 1     |
| Not hospitalized, but unable to perform normal activities                                                                                             | 2     |
| Hospitalized, not requiring supplemental oxygen                                                                                                       | 3     |
| Hospitalized, requiring supplemental oxygen via nasal cannula                                                                                         | 4     |
| Hospitalized, requiring respiratory support via non-rebreather mask, or high-flow nasal cannula oxygen therapy, or noninvasive mechanical ventilation | 5     |
| Hospitalized, requiring extracorporeal membrane oxygen, invasive mechanical ventilation, or both                                                      | 6     |
| Death                                                                                                                                                 | 7     |

**Table S2: Risk factors for in-hospital mortality adjusted by Sequential Organ Failure Assessment Score**

| Variable                                                           | Univariable HR<br>(95% CI) | Multivariable HR<br>(95% CI) |
|--------------------------------------------------------------------|----------------------------|------------------------------|
| Age, per ten-year increase                                         | 1.49 (1.29-1.73)           | 1.28 (1.06-1.54)             |
| Male gender                                                        | 0.85 (0.57-1.27)           | 1.34 (0.81-2.21)             |
| Symptom duration prior to hospital presentation, per day           | 0.98 (0.93-1.02)           | 1.01 (0.97-1.05)             |
| Hypertension                                                       | 2.24 (1.40-3.59)           | 1.81 (1.01-3.25)             |
| Chronic cardiac disease <sup>a</sup>                               | 2.21 (1.44-3.39)           | 1.76 (1.04-2.99)             |
| Chronic obstructive pulmonary disease or interstitial lung disease | 3.15 (1.84-5.39)           | 4.39 (2.13-9.03)             |
| Chronic kidney disease                                             | 1.50 (0.92-2.45)           | ---                          |
| Diabetes mellitus                                                  | 1.65 (1.11-2.44)           | 1.57 (0.95-2.60)             |
| Body-mass-index $\geq 40$                                          | 0.76 (0.40-1.47)           | ---                          |
| Interleukin-6, per-decile increase                                 | 1.12 (1.04-1.21)           | 1.11 (1.01-1.21)             |
| D-dimer, per-decile increase                                       | 1.18 (1.10-1.27)           | 1.08 (0.99-1.19)             |
| SOFA score, per one-point increase                                 | 1.13 (1.06-1.21)           | 1.06 (0.98-1.15)             |

Abbreviations: HR: hazard ratio; CI: Confidence interval; SOFA: Sequential Organ Failure Assessment.

Legend: <sup>a</sup>Coronary artery disease or congestive heart failure

## **Figure Legend**

**Figure S1: Flow diagram for study**

Figure S1

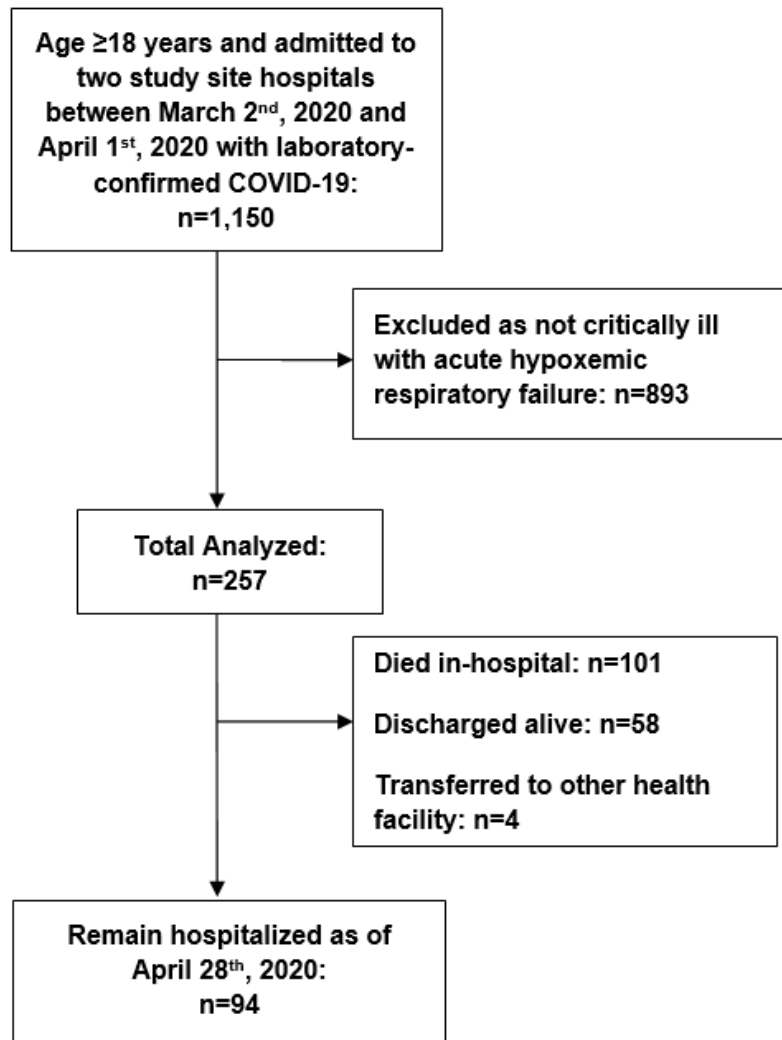

Supplement: mmc1.pdf [file mmc1.pdf]
